# Supplementary material
Source: PubMed Central journal article supplement (PMC2724185)
Supplement: NIHMS130144-supplement-01.pdf [file NIHMS130144-supplement-01.pdf]

# Supplementary Data

## Probing Conformational Changes of Human DNA Polymerase $\lambda$ Using Mass Spectrometry-Based Protein Footprinting

Jason D. Fowler, Jessica A. Brown, Mamuka Kvaratskhelia, and Zucui Suo

**Supplementary Table 1.** Positively-charged residues that potentially stabilize the triphosphate moiety of an incoming nucleotide and/or pyrophosphate product.

| DNA polymerase (PDB)       | Family | $\alpha$ -phosphate          | $\beta$ -phosphate                            | $\gamma$ -phosphate                                 | Notes                                   | Reference |
|----------------------------|--------|------------------------------|-----------------------------------------------|-----------------------------------------------------|-----------------------------------------|-----------|
| Human Pol $\lambda$ (1XSN) | X      | None                         | R420 (3.00 and 3.10 Å)<br>S417 (3.06 Å)       | R386 (2.90 and 3.04 Å)                              | Backbone of S417                        | [1]       |
| Human Pol $\lambda$ (1XSP) | X      | Linked to primer             | R420 (2.82 and 3.74 Å)<br>S417 (2.65 Å)       | R386 (2.77, 3.39, 3.73 and 3.77 Å)<br>G426 (3.08 Å) | PPi bound<br>Backbone for S417 and G426 | [1]       |
| Human Pol $\beta$ (1BPY)   | X      | None                         | R183 (2.84 and 2.85 Å)                        | None                                                | Some R nearby but >4.0 Å                | [2]       |
| Pol mu (2IHM)              | X      | None                         | R323 (3.23 Å)                                 | K325 (2.83 Å)<br>H329 (2.93 and 3.05 Å)             | Side chain and backbone for H329        | [3]       |
| Mouse TdT (1KEJ)           | X      | R454 (2.57 Å)                | R336 (3.57 Å)                                 | H342 (2.84 Å)                                       | Backbone for H342                       | [4]       |
| Dpo4 (1JX4)                | Y      | R51 (3.13 Å)<br>Y10 (3.40 Å) | R51 (2.82 Å)<br>K159 (2.93 Å)<br>Y48 (3.71 Å) | N/A                                                 | dADP,<br>backbone of Y10                | [5]       |
| Dpo4                       | Y      | K159 (3.64 Å)                | F11 (3.03 and 3.03 Å)                         | R51 (2.89 and 3.53 Å)                               | dCTP,                                   | [6]       |

|                                                                                       |   |                               |                                         |                                                                        |                                                                           |      |
|---------------------------------------------------------------------------------------|---|-------------------------------|-----------------------------------------|------------------------------------------------------------------------|---------------------------------------------------------------------------|------|
| (2ATL)                                                                                |   |                               | K159 (2.93 Å)                           | Y10 (3.09 Å)<br>K159 (3.12 and 3.27 Å)<br>Y48 (2.55 Å)                 | backbone of Y10 and F11                                                   |      |
| Dpo4<br>(2AGO)                                                                        | Y | None when<br>linked to primer | K159 (3.58, 3.65 and<br>3.82 Å)         | R51 (3.04 and 3.94 Å)<br>Y10 (3.13 and 3.28 Å)                         | dGMP-PPi structure<br>backbone of Y10                                     | [7]  |
| Dbh<br>(3BQ1)                                                                         | Y | None                          | F11 (2.93 Å)<br>Y10 (3.34 Å)            | K160 (3.08, 3.17, and<br>3.59 Å)<br>R50 (3.17 and 3.22 Å)              | Backbone of Y10 and F11                                                   | [8]  |
| Yeast Pol eta<br>(2R8J)                                                               | Y | R73 (3.24 and<br>3.35 Å)      | R73 (3.02 and 3.15 Å)                   | R67 (3.64 and 4.01 Å)<br>K289 (2.89 Å)                                 | dCTP, 3'-Cisplatin<br>structure, AA numbering is<br>according to PDB file | [9]  |
| Human Pol<br>iota<br>(2FLL)                                                           | Y | None                          | C37 (3.63 Å)                            | R71 (2.92 and 3.02 Å)<br>K77 (3.60 Å)<br>K214 (2.60 Å)<br>F38 (3.34 Å) | Backbone for C37 and F38                                                  | [10] |
| Human Pol<br>kappa<br>(2OH2)                                                          | Y | None                          | F111 (2.95 Å)                           | R144 (2.74, 3.64 and<br>3.69 Å)<br>K328 (2.81 Å)<br>A110 (3.28 Å)      | Backbone for A110 and<br>F111                                             | [11] |
| Rev1<br>(2AQ4)                                                                        | Y | None                          | N414 (2.94 Å)                           | R408 (2.69 and 2.77 Å)<br>K525 (3.02 Å)<br>C365 (2.62 Å)               | Backbone for C365                                                         | [12] |
| T7<br>(1SKR)                                                                          | A | K522 (2.85 Å)                 | H506 (2.75 Å)<br>G478 (3.40 Å)          | R518 (2.83 and 3.33 Å)<br>K522 (3.60 Å)<br>G478 (2.71 Å)               | Backbone for G478                                                         | [13] |
| <i>Bacillus<br/>stearothermo<br/>philus</i> DNA<br>polymerase I<br>Fragment<br>(1LV5) | A | K706 (3.10 Å)                 | H682 (3.59 Å)<br>I657 (3.79 and 3.90 Å) | R702 (2.91 and 3.18 Å)<br>Q656 (3.21 Å)                                | Backbone for Q656                                                         | [14] |
| <i>Tag</i>                                                                            | A | None within 4.0               | None within 4.0 Å                       | None within 4.0 Å                                                      | open ternary                                                              | [15] |

|                      |    |                           |                                         |                                         |                                                      |      |
|----------------------|----|---------------------------|-----------------------------------------|-----------------------------------------|------------------------------------------------------|------|
| (2KTQ)               |    | Å                         |                                         |                                         |                                                      |      |
| <i>Taq</i><br>(3KTQ) | A  | K663 (3.01 and<br>3.94 Å) | H639 (3.10 Å)                           | R659 (2.97 and 2.87 Å)                  | active ternary                                       | [15] |
| RB69<br>(2OZS)       | B  | K560 (3.19 Å)             | N564 (3.72 Å)                           | R482 (2.80 and 2.94 Å)<br>K560 (2.80 Å) |                                                      | [16] |
| Phi29<br>(2PYL)      | B  | None                      | N387 (3.50 Å)<br>K383 (3.60 and 3.89 Å) | K371 (3.90 Å)                           |                                                      | [17] |
| HIV-1 RT<br>(2IAJ)   | RT | None                      | None                                    | K219 (3.07 Å)                           | Mutant, no DNA<br>RNA/DNA substrate, ATP<br>is bound | [18] |

## References

1. Garcia-Diaz, M., Bebenek, K., Krahn, J. M., Kunkel, T. A. & Pedersen, L. C. (2005) A closed conformation for the Pol lambda catalytic cycle, *Nat Struct Mol Biol.* *12*, 97-98.
2. Sawaya, M. R., Prasad, R., Wilson, S. H., Kraut, J. & Pelletier, H. (1997) Crystal structures of human DNA polymerase beta complexed with gapped and nicked DNA: evidence for an induced fit mechanism, *Biochemistry.* *36*, 11205-15.
3. Moon, A. F., Garcia-Diaz, M., Bebenek, K., Davis, B. J., Zhong, X., Ramsden, D. A., Kunkel, T. A. & Pedersen, L. C. (2007) Structural insight into the substrate specificity of DNA Polymerase mu, *Nat Struct Mol Biol.* *14*, 45-53.
4. Delarue, M., Boule, J. B., Lescar, J., Expert-Bezancon, N., Jourdan, N., Sukumar, N., Rougeon, F. & Papanicolaou, C. (2002) Crystal structures of a template-independent DNA polymerase: murine terminal deoxynucleotidyltransferase, *Embo J.* *21*, 427-39.
5. Ling, H., Boudsocq, F., Woodgate, R. & Yang, W. (2001) Crystal structure of a Y-family DNA polymerase in action: a mechanism for error-prone and lesion-bypass replication, *Cell.* *107*, 91-102.
6. Rechkoblit, O., Malinina, L., Chen, Y., Kuryavyy, V., Broyde, S., Geacintov, N. E. & Patel, D. J. (2006) Stepwise translocation of Dpo4 polymerase during error-free bypass of an oxoG lesion, *PLOS Biology.* *4*, 25-42.
7. Vaisman, A., Ling, H., Woodgate, R. & Yang, W. (2005) Fidelity of Dpo4: effect of metal ions, nucleotide selection and pyrophosphorolysis, *Embo J.* *24*, 2957-2967.
8. Wilson, R. C. & Pata, J. D. (2008) Structural insights into the generation of single-base deletions by the Y family DNA polymerase dbh, *Mol Cell.* *29*, 767-79.
9. Alt, A., Lammens, K., Chicchini, C., Lammens, A., Pieck, J. C., Kuch, D., Hopfner, K. P. & Carell, T. (2007) Bypass of DNA lesions generated during anticancer treatment with cisplatin by DNA polymerase eta, *Science.* *318*, 967-70.
10. Nair, D. T., Johnson, R. E., Prakash, L., Prakash, S. & Aggarwal, A. K. (2006) An incoming nucleotide imposes an anti to syn conformational change on the templating purine in the human DNA polymerase-iota active site, *Structure.* *14*, 749-55.
11. Lone, S., Townson, S. A., Uljon, S. N., Johnson, R. E., Brahma, A., Nair, D. T., Prakash, S., Prakash, L. & Aggarwal, A. K. (2007) Human DNA polymerase kappa encircles DNA: implications for mismatch extension and lesion bypass, *Mol Cell.* *25*, 601-14.
12. Nair, D. T., Johnson, R. E., Prakash, L., Prakash, S. & Aggarwal, A. K. (2005) Rev1 employs a novel mechanism of DNA synthesis using a protein template, *Science.* *309*, 2219-22.
13. Li, Y., Dutta, S., Doublet, S., Bdour, H. M., Taylor, J. S. & Ellenberger, T. (2004) Nucleotide insertion opposite a cis-syn thymine dimer by a replicative DNA polymerase from bacteriophage T7, *Nat Struct Mol Biol.* *11*, 784-90.
14. Johnson, S. J., Taylor, J. S. & Beese, L. S. (2003) Processive DNA synthesis observed in a polymerase crystal suggests a mechanism for the prevention of frameshift mutations, *Proc Natl Acad Sci U S A.* *100*, 3895-900.
15. Li, Y., Korolev, S. & Waksman, G. (1998) Crystal structures of open and closed forms of binary and ternary complexes of the large fragment of *Thermus aquaticus* DNA polymerase I: structural basis for nucleotide incorporation, *Embo J.* *17*, 7514-25.

16. Zahn, K. E., Belrhali, H., Wallace, S. S. & Doublet, S. (2007) Caught bending the A-rule: crystal structures of translesion DNA synthesis with a non-natural nucleotide, *Biochemistry*. 46, 10551-61.
17. Berman, A. J., Kamtekar, S., Goodman, J. L., Lazaro, J. M., de Vega, M., Blanco, L., Salas, M. & Steitz, T. A. (2007) Structures of phi29 DNA polymerase complexed with substrate: the mechanism of translocation in B-family polymerases, *Embo J*. 26, 3494-505.
18. Das, K., Sarafianos, S. G., Clark, A. D., Jr., Boyer, P. L., Hughes, S. H. & Arnold, E. (2007) Crystal structures of clinically relevant Lys103Asn/Tyr181Cys double mutant HIV-1 reverse transcriptase in complexes with ATP and non-nucleoside inhibitor HBY 097, *J Mol Biol*. 365, 77-89.
